# Supplementary material for: Development and Clinical Validation of RT-LAMP-Based Lateral-Flow Devices and Electrochemical Sensor for Detecting Multigene Targets in SARS-CoV-2
Source: MDPI journal article supplement (doi:10.3390/ijms232113105), 2022-10-28
Supplement: s1 [file s1]

## **Supporting Information**

**Title: Development and clinical validation of RT-LAMP based lateral-flow devices and electrochemical sensor for detecting multi-gene targets in SARS-CoV-2**

Apoorva Saxena<sup>1</sup>, Pawankumar Rai<sup>1</sup>, Srishti Mehrotra<sup>1,2</sup>, Samiya Baby<sup>3</sup>, Suman Singh<sup>2,4</sup>, Vikas Srivastava<sup>2,3</sup>, Smriti Priya<sup>2,3</sup> and Sandeep K. Sharma<sup>1,2\*</sup>

## Supplementary Tables

**Table S1: Sequences of LAMP primers used in this study**

| Table S1a: Target Name- N-gene |         |                                                 |                       |
|--------------------------------|---------|-------------------------------------------------|-----------------------|
| Primer ID                      | Primers | Sequence (5' – 3')                              | PMID No.              |
| N-1                            | F3      | TGGCTACTACCGAAGAGCT                             | 32719001,<br>32635743 |
|                                | B3      | TGCAGCATTGTTAGCAGGAT                            |                       |
|                                | FIP     | TCTGGCCCAGTTCCTAGGTAGTCCAGACGAATTCGTGGTGG       |                       |
|                                | BIP     | AGACGGCATCATATGGGTTGCACGGGTGCCAATGTGATCT        |                       |
|                                | LF      | GGACTGAGATCTTTCATTTTACCGT                       |                       |
|                                | LB      | ACTGAGGGAGCCTTGAATACA                           |                       |
| N-2                            | F3      | ACCAGGAACTAATCAGACAAG                           | 32635743              |
|                                | B3      | GACTTGATCTTTGAAATTTGGATCT                       |                       |
|                                | FIP     | TTCCGAAGAACGCTGAAGCGGAACCTGATTACAAACATTGG<br>CC |                       |
|                                | BIP     | CGCATTGGCATGGAAGTCACAATTTGATGGCACCTGTGTA        |                       |
|                                | LF      | GGGGGCAAATTGTGCAATTTG                           |                       |
|                                | LB      | CTTCGGGAACGTGGTTGACC                            |                       |
| N-3                            | F3      | GCCAAAAGGCTTCTACGCA                             | 32276051              |
|                                | B3      | TTGCTCTCAAGCTGGTTCAA                            |                       |
|                                | FIP     | TCCCCTACTGCTGCCTGGAGGCAGTCAAGCCTCTTCTCG         |                       |
|                                | BIP     | TCTCCTGCTAGAATGGCTGGCATCTGTCAAGCAGCAGCAAA<br>G  |                       |
|                                | LF      | TGGTGGACCCTCAGATTCAA                            |                       |
|                                | LB      | ATGGCGGTGATGCTGCTCT                             |                       |
| N-4                            | F3      | GTTGTTCGTTCTATGAAGACT                           | 32547882              |
|                                | B3      | GACGTTGTTTTGATCGCG                              |                       |
|                                | FIP     | CGAACGTCATGATACTCTAAAATGTCTGATAATGGACCCCA       |                       |
|                                | BIP     | CGAAATGCACCCCGCATTACCCACTGCGTTCTCCATTC          |                       |
|                                | LF      | TGTTTCGTTTAGATGAAATC                            |                       |
|                                | LB      | TGGTGGACCCTCAGATTCAA                            |                       |
| N-5                            | F3      | CCAGAATGGAGAACGCAGTG                            | 32626666              |
|                                | B3      | CCGTCACCACCACGAATT                              |                       |
|                                | FIP     | AGCGGTGAACCAAGACGCAGGGCGCGATCAAAACAACG          |                       |
|                                | BIP     | AATTCCCTCGAGGACAAGGCGAGCTCTTCGGTAGTAGCCAA       |                       |
|                                | LF      | TTATTGGGTAAACCTTGGGGC                           |                       |
|                                | LB      | TTCCAATTAACACCAATAGCAGTCC                       |                       |

|      |     |                                             |               |
|------|-----|---------------------------------------------|---------------|
| N-6  | F3  | CACAAGCTTTCGGCAGAC                          | 32588005      |
|      | B3  | CATCCAATTTGATGGCACC                         |               |
|      | FIP | CGGCCAATGTTTGTAATCAGTTCCTGGTCCAGAACAAACCCAA |               |
|      | BIP | CGTTCTTCGGAATGTCGCGCGTAGGTCAACCACGTTCC      |               |
|      | LF  | TTCCTGGTCCCCAAAATTTCC                       |               |
|      | LB  | ATTGGCATGGAAGTCACACC                        |               |
| N-7  | F3  | TGGACCCCAAAATCAGCG                          | 32333644      |
|      | B3  | GCCTTGTCTCGAGGGAAT                          |               |
|      | FIP | CCACTGCGTTCTCCATTCTGGTAAATGCACCCCGCATTACG   |               |
|      | BIP | CGCGATCAAAACAACGTCGGCCCTTGCCATGTTGAGTGAGA   |               |
|      | LF  | TGAATCTGAGGGTCCACCAA                        |               |
|      | LB  | GGTTTACCCAATAATACTGCGTCTT                   |               |
| N-8  | F3  | AGATCACATTGGCACCCG                          | 32333644      |
|      | B3  | CCATTGCCAGCCATTCTAGC                        |               |
|      | FIP | TGCTCCCTTCTGCGTAGAAGCCAATGCTGCAATCGTGCTAC   |               |
|      | BIP | GGCGGCAGTCAAGCCTCTTCCCTACTGCTGCCTGGAGTT     |               |
|      | LF  | GCAATGTTGTTCTTGAGGAAGTT                     |               |
|      | LB  | GTTCTCATCACGTAGTCGCAACA                     |               |
| N-9  | F3  | CTACCTAGGAACTGGGCC                          | 32692666      |
|      | B3  | AGAAGAGGCTTGACTGCC                          |               |
|      | FIP | GGTGTATTCAAGGCTCCCTCACCTATGGTGCTAACAAGAC    |               |
|      | BIP | AATCCTGCTAACAATGCTGCAATCCTGCTCCCTTCTGCGTAG  |               |
|      | L F | GTTGCAACCCATATGATGC                         |               |
|      | L B | CTTCCTCAAGGAACAACAT                         |               |
| N-10 | F3  | GCTGCAATCGTGCTACAACT                        | Self-designed |
|      | B3  | TTGCTCTCAAGCTGGTTCAA                        |               |
|      | FIP | TGCGACTACGTGATGAGGAACGTTGCCAAAAGGCTTCTACGC  |               |
|      | BIP | AATCCAGGCAGCAGTAGGGGAGCAGCAGCAAAGCAAGAG     |               |
|      | L F | AGGCTTGACTGCCGCCTCT                         |               |
|      | L B | CTCCTGCTAGAAATGGCTGGC                       |               |

| Table S1b: Target Name- ORF-1ab-gene |        |                                                  |               |
|--------------------------------------|--------|--------------------------------------------------|---------------|
| Primer ID                            | Primer | Sequence (5' – 3')                               | Reference     |
| ORF-1AB-1                            | F3     | TGCTTCAGTCAGCTGATG                               | 32361529      |
|                                      | B3     | TTAAATTGTCATCTTCGTCCTT                           |               |
|                                      | FIP    | TCAGTACTAGTGCCTGTGCCCACAATCGTTTTTAAACGGGT        |               |
|                                      | BIP    | TCGTATACAGGGCTTTTGACATCTATCTTGGAAGCGACAACAA      |               |
|                                      | LF     | CTGCACTTACACCGCAA                                |               |
|                                      | LB     | GTAGCTGGTTTTGCTAAATTCC                           |               |
| ORF-1AB-2                            | F3     | GGTATGATTTTGTAGAAAACCCA                          | 32276116      |
|                                      | B3     | CAACAGGAACTCCACTACC                              |               |
|                                      | FIP    | GGCATCACAGAATTGTACTGTTTTTGCGTATACGCCAACTTAGG     |               |
|                                      | BIP    | AATGCTGGTATTGTTGGTGTACTGAGGTTTGTATGAAATCACCGAA   |               |
|                                      | LF     | AACAAAGCTTGGCGTACACGTTCA                         |               |
| ORF-1AB-3                            | F3     | GGATTTTGTGACTTAAAAGGTAAG                         | 32692666      |
|                                      | B3     | GCACTTACACCGCAAACC                               |               |
|                                      | FIP    | CGGTACAGACTGTGTTTTTAAGTGTGTACAAATACCTACAACTTGTG  |               |
|                                      | BIP    | TCTGCGGTATGTGGAAAGGTTATAAACGATTGTGCATCAGC        |               |
|                                      | LF     | AAACCCACAGGGTCATTAG                              |               |
|                                      | LB     | GAACCCATGCTTCAGTC                                |               |
| ORF-1AB-4                            | F3     | TTGTGCTAATGACCCTGT                               | Self-designed |
|                                      | B3     | TCAAAAGCCCTGTATACGA                              |               |
|                                      | FIP    | GATCACAACCTACAGCCATAACCTTTTACACTTAAAAACACAGTCTGT |               |
|                                      | BIP    | GCTGATGCACAATCGTTTTTAAACGCATCAGTACTAGTGCCTGT     |               |
|                                      | LF     | CCACATACCGCAGACGGT                               |               |
|                                      | LB     | GGTGTAAGTGCAGCCCGT                               |               |

| Table S1c: Target Name- E-gene |         |                                              |          |
|--------------------------------|---------|----------------------------------------------|----------|
| Primer ID                      | Primers | Sequence (5' – 3')                           | PMID no. |
| E-1                            | F3      | TGAGTACGAACTTATGTACTCAT                      | 32635743 |
|                                | B3      | TTCAGATTTTTTAACACGAGAGT                      |          |
|                                | FIP     | ACCACGAAAGCAAGAAAAAGAAGTTCGTTTCGGAAGAGACAG   |          |
|                                | BIP     | TTGCTAGTTACACTAGCCATCCTTAGGTTTTACAAGACTCACGT |          |
|                                | LF      | CGCTATTAACCTATTAACG                          |          |
|                                | LB      | GCGCTTCGATTGTGTGCGT                          |          |

| Table S1d: Target Name- S-gene |         |                                                  |               |
|--------------------------------|---------|--------------------------------------------------|---------------|
| Primer ID                      | Primers | Sequence (5' – 3')                               | PMID No.      |
| S-1                            | F3      | TCTATTGCCATACCCACAA                              | 32276116      |
|                                | B3      | GGTGTTTTGTAAATTTGTTTGAC                          |               |
|                                | FIP     | CATTCAGTTGAATCACCACAAATGTGTGTTACCACAGAAATTCTACC  |               |
|                                | BIP     | GTTGCAATATGGCAGTTTTTTGTACATTGGGTGTTTTTGTCTGTT    |               |
|                                | LF      | ACTGATGTCTTGGTCATAGACACT                         |               |
|                                | LB      | TAAACCGTGCTTTAACTGGAATAGC                        |               |
| S-2                            | F3      | CTGACAAAGTTTTTCAGATCCTCAG                        | 32276051      |
|                                | B3      | AGTACCAAAAATCCAGCCTCTT                           |               |
|                                | FIP     | TCCCAGAGACATGTATAGCATGGAATCAACTCAGGACTTGTTCTTACC |               |
|                                | BIP     | TGGTACTAAGAGGTTTTGATAACCCTGTTAGACTTCTCAGTGGAAGCA |               |
|                                | LF      | CCAAGTAACATTGGAAAAGAAA                           |               |
|                                | LB      | GTCCTACCATTTAATGATGGTGTTT                        |               |
| S-3                            | F3      | TCTTTCACACGTGGTGTT                               | 32333644      |
|                                | B3      | GTACCAAAAATCCAGCCTC                              |               |
|                                | FIP     | CATGGAACCAAGTAACATTGGAAAACCTGACAAAGTTTTTCAGATCC  |               |
|                                | BIP     | CTCTGGGACCAATGGTACTAAGAGGACTTCTCAGTGGAAGCA       |               |
|                                | LF      | GAAAGGTAAGAACAAGTCCTGAGT                         |               |
|                                | LB      | CTGTCCTACCATTTAATGATGGTGTT                       |               |
| S-4                            | F3      | GTGTTACCACAGAAATTCTACC                           | Self-designed |
|                                | B3      | GTGCAAAAACCTCTTGGGT                              |               |
|                                | FIP     | GCATTCAGTTGAATCACCACAAATAGTGTCTATGACCAAGACATC    |               |
|                                | BIP     | AGCAATCTTTTGTGCAATATGGCTTTTTGTCTTGTTCAACAGCTAT   |               |
|                                | Loop B  | CACAATTAAACCGTGCTTTAACTGG                        |               |

**Table S1e: RT-LAMP primers selected for labelling**

| Primer ID | Primers | Sequence (5' – 3')                                     | PMID No. |
|-----------|---------|--------------------------------------------------------|----------|
| N-5       | F3      | CCAGAATGGAGAACGCAGTG                                   | 32626666 |
|           | B3      | CCGTCACCACCACGAATT                                     |          |
|           | FIP     | AGCGGTGAACCAAGACGCAGGGCGCGATCAAAACAACG                 |          |
|           | BIP     | AATTCCCTCGAGGACAAGGCGAGCTCTTCGGTAGTAGCCAA              |          |
|           | LF      | TTATTGGGTAAACCTTGGGGC                                  |          |
|           | LB      | TTCCAATTAACACCAATAGCAGTCC                              |          |
|           | FIP*    | Biotin AGCGGTGAACCAAGACGCAGGGCGCGATCAAAACAACG          |          |
|           | BIP*    | FAM<br>AATTCCCTCGAGGACAAGGCGAGCTCTTCGGTAGTAGCCAA       |          |
| N-9       | F3      | CTACCTAGGAAGTGGGCC                                     | 32692666 |
|           | B3      | AGAAGAGGCTTGACTGCC                                     |          |
|           | FIP     | GGTGTATTCAAGGCTCCCTCACCTATGGTGCTAACAAAGAC              |          |
|           | BIP     | AATCCTGCTAACAATGCTGCAATCCTGCTCCCTTCTGCGTAG             |          |
|           | LF      | GTTGCAACCCATATGATGC                                    |          |
|           | LB      | CTTCCTCAAGGAACAACAT                                    |          |
|           | LF*     | Biotin GTTGCAACCCATATGATGC                             |          |
|           | LB*     | FAM CTTCCTCAAGGAACAACAT                                |          |
| ORF-1AB-1 | F3      | TGCTTCAGTCAGCTGATG                                     | 32361529 |
|           | B3      | TTAAATTGTCATCTTCGTCTT                                  |          |
|           | FIP     | TCAGTACTAGTGCTGTGCCACAATCGTTTTTAAACGGGT                |          |
|           | BIP     | TCGTATACAGGGCTTTTGACATCTATCTTGGAAGCGACAACAA            |          |
|           | LF      | CTGCACTTACACCGCAA                                      |          |
|           | LB      | GTAGCTGGTTTTGCTAAATTCC                                 |          |
|           | LF*     | Biotin CTGCACTTACACCGCAA                               |          |
|           | LB*     | FAM GTAGCTGGTTTTGCTAAATTCC                             |          |
| ORF-1AB-2 | F3      | GGTATGATTTTGTAGAAAACCCA                                | 32276116 |
|           | B3      | CAACAGGAACTCCACTACC                                    |          |
|           | FIP     | GGCATCACAGAATTGTACTGTTTTTGCGTATACGCCAACTTAGG           |          |
|           | BIP     | AATGCTGGTATTGTTGGTGTACTGAGGTTTGTATGAAATCACCGAA         |          |
|           | LF      | AACAAAGCTTGGCGTACACGTTCA                               |          |
|           | FIP*    | Biotin<br>GGCATCACAGAATTGTACTGTTTTTGCGTATACGCCAACTTAGG |          |
|           | BIP*    | FAM<br>AATGCTGGTATTGTTGGTGTACTGAGGTTTGTATGAAATCACCGAA  |          |
| E-1       | F3      | TGAGTACGAACTTATGTACTCAT                                | 32635743 |
|           | B3      | TTCAGATTTTAAACACGAGAGT                                 |          |
|           | FIP     | ACCACGAAAGCAAGAAAAAGAAGTTCGTTTCGGAAGAGACAG             |          |

|     |      |                                                         |                   |
|-----|------|---------------------------------------------------------|-------------------|
|     | BIP  | TTGCTAGTTACACTAGCCATCCTTAGGTTTTACAAGACTCACGT            |                   |
|     | LF   | CGCTATTAAGTATTAACG                                      |                   |
|     | LB   | GCGCTTCGATTGTGTGCGT                                     |                   |
|     | LF*  | Biotin CGCTATTAAGTATTAACG                               |                   |
|     | LB*  | FAM GCGCTTCGATTGTGTGCGT                                 |                   |
| S-1 | F3   | TCTATTGCCATACCCACAA                                     | 32276116          |
|     | B3   | GGTGTTTTGTAATTTGTTTGAC                                  |                   |
|     | FIP  | CATTGAGTTGAATCACCACAAATGTGTGTTACCACAGAAATCTAC<br>C      |                   |
|     | BIP  | GTTGCAATATGGCAGTTTTTGATACATTGGGTGTTTTGTCTTGTT           |                   |
|     | LF   | ACTGATGTCTTGGTCATAGACACT                                |                   |
|     | LB   | TAAACCGTGCTTTAACTGGAATAGC                               |                   |
|     | LF*  | Biotin ACTGATGTCTTGGTCATAGACACT                         |                   |
|     | LB*  | FAM TAAACCGTGCTTTAACTGGAATAGC                           |                   |
| S-4 | F3   | GTGTTACCACAGAAATTCTACC                                  | Self-<br>designed |
|     | B3   | GTGCAAAAACCTTCTTGGGT                                    |                   |
|     | FIP  | GCATTGAGTTGAATCACCACAAATAGTGTCTATGACCAAGACATC           |                   |
|     | BIP  | AGCAATCTTTTGTTGCAATATGGCTTTTTGTCTTGTTCAACAGCTAT         |                   |
|     | LF   | CACAATTAAACCGTGCTTTAACTGG                               |                   |
|     | FIP* | Biotin<br>GCATTGAGTTGAATCACCACAAATAGTGTCTATGACCAAGACATC |                   |
|     | BIP* | FAM<br>AGCAATCTTTTGTTGCAATATGGCTTTTTGTCTTGTTCAACAGCTAT  |                   |

**Table S2: Primers for invitro transcription of viral mRNA used in this study**

| Target          | Forward primer (5'-3')                           | Reverse primer (5'-3')        |
|-----------------|--------------------------------------------------|-------------------------------|
| N-gene          | TAATACGACTCACTATAGGGGTTGTTTCGTTCTATGAA<br>GACT   | GACTTGATCTTTGAAATTTGGA<br>TCT |
| ORF<br>lab-gene | TAATACGACTCACTATAGGGGGATTTTGTGACTTAAA<br>AGGTAAG | CAACAGGAACTCCACTACC           |
| E-gene          | TAATACGACTCACTATAGGGTGAGTACGAACTTATGT<br>ACTCAT  | TTCAGATTTTAAACACGAGAGT        |
| S-gene          | TAATACGACTCACTATAGGGTCTATTGCCATACCCAC<br>AA      | GGTGTTTTGTAAATTTGTTTGA<br>C   |

\*RNA polymerase Promoter-(T7 TAATACGACTCACTATAGGG)



**Table S3: Yield and purity ratio of invitro transcribed viral mRNA used in the study**

| Target      | Concentration (ng/μl) | A260/280 | A260/230 |
|-------------|-----------------------|----------|----------|
| N-gene      | 998.8                 | 2.20     | 2.34     |
| ORF1ab-gene | 1246.6                | 2.27     | 2.43     |
| E-gene      | 3022.9                | 2.14     | 2.40     |
| S-gene      | 3398.5                | 2.15     | 2.29     |

**Table S4: Primers selected for the establishment of RT-LAMP based LFD assay**

| Primer ID                          | Primers | Sequence (5' – 3')                                    | PMID No.          |
|------------------------------------|---------|-------------------------------------------------------|-------------------|
| <b>N-gene<br/>(N-9)</b>            | F3      | CTACCTAGGAACTGGGCC                                    | 32692666          |
|                                    | B3      | AGAAGAGGCTTGACTGCC                                    |                   |
|                                    | FIP     | GGTGTATTCAAGGCTCCCTCACCTATGGTGCTAACAAAGAC             |                   |
|                                    | BIP     | AATCCTGCTAACAAATGCTGCAATCCTGCTCCCTTCTGCGTAG           |                   |
|                                    | LF      | GTTGCAACCCATATGATGC                                   |                   |
|                                    | LB      | CTTCCTCAAGGAACAACAT                                   |                   |
|                                    | LF*     | Biotin GTTGCAACCCATATGATGC                            |                   |
|                                    | LB*     | FAM CTTCCTCAAGGAACAACAT                               |                   |
| <b>ORF1ab-gene<br/>(ORF-1AB-2)</b> | F3      | GGTATGATTTTGTAGAAAACCCA                               | 32276116          |
|                                    | B3      | CAACAGGAACTCCACTACC                                   |                   |
|                                    | FIP     | GGCATCACAGAATTGTACTGTTTTTTCGTATACGCCAACTTAGG          |                   |
|                                    | BIP     | AATGCTGGTATTGTTGGTGTACTGAGGTTTGTATGAAATCACCGAA        |                   |
|                                    | LF      | AACAAAGCTTGGCGTACACGTTCA                              |                   |
|                                    | FIP*    | Biotin GGCATCACAGAATTGTACTGTTTTTTCGTATACGCCAACTTAGG   |                   |
|                                    | BIP*    | FAM AATGCTGGTATTGTTGGTGTACTGAGGTTTGTATGAAATCACCGAA    |                   |
| <b>E-gene<br/>(E-1)</b>            | F3      | TGAGTACGAACTTATGTACTCAT                               | 32635743          |
|                                    | B3      | TTCAGATTTTAAACACGAGAGT                                |                   |
|                                    | FIP     | ACCACGAAAGCAAGAAAAAGAAAGTTCGTTTCGGAAGAGACAG           |                   |
|                                    | BIP     | TTGCTAGTTACACTAGCCATCCTTAGGTTTACAAGACTCACGT           |                   |
|                                    | LF      | CGCTATTAACCTATTAACG                                   |                   |
|                                    | LB      | GCGCTTCGATTGTGTGCGT                                   |                   |
|                                    | LF*     | Biotin CGCTATTAACCTATTAACG                            |                   |
|                                    | LB*     | FAM GCGCTTCGATTGTGTGCGT                               |                   |
| <b>S-gene<br/>(S-4)</b>            | F3      | GTGTTACCACAGAAATTCTACC                                | Self-<br>designed |
|                                    | B3      | GTGCAAAAACTTCTTGGGT                                   |                   |
|                                    | FIP     | GCATTCAGTTGAATCACCCACAAATAGTGTCTATGACCAAGACATC        |                   |
|                                    | BIP     | AGCAATCTTTTGTGCAATATGGCTTTTGTCTTGTTCACAGCTAT          |                   |
|                                    | LB      | CACAATTAAACCGTGCTTAACTGG                              |                   |
|                                    | FIP*    | Biotin GCATTCAGTTGAATCACCCACAAATAGTGTCTATGACCAAGACATC |                   |
|                                    | BIP*    | FAM AGCAATCTTTTGTGCAATATGGCTTTTGTCTTGTTCACAGCTAT      |                   |

## **Supplementary Figures**

**Figure S1: Sequences for customized DNA synthesis**

### **1. E GENE (26232-26441)**

TGAGTACGAACTTATGTACTCATTCGTTTCGGAAGAGACAGGTACGTTAATAGTTAA  
TAGCGTACTTCTTTTTCTTGCTTTCGTGGTATTCTTGCTAGTTACACTAGCCATCCTTA  
CTGCGCTTCGATTGTGTGCGTACTGCTGCAATATTGTTAACGTGAGTCTTGTA AAAACC  
TTCTTTTTACGTTTACTCTCGTGTTAAAAATCTGAA

### **2. N-GENE (28195-29323)**

GTTGTTTCGTTCTATGAAGACTTTTTAGAGTATCATGACGTTTCGTGTTGTTTTAGATTT  
CATCTAAACGAACAACTAAAATGTCTGATAATGGACCCCAAAATCAGCGAAATGC  
ACCCCGCATTACGTTTGGTGGACCCTCAGATTCAACTGGCAGTAACCAGAATGGAGA  
ACGCAGTGGGGCGCGATCAAAACAACGTCGGCCCCAAGGTTTACCCAATAATACTG  
CGTCTTGGTTCACCGCTCTCACTCAACATGGCAAGGAAGACCTTAAATTCCCTCGAG  
GACAAGGCGTTCCAATTAACACCAATAGCAGTCCAGATGACCAAATTGGCTACTAC  
CGAAGAGCTACCAGACGAATTCGTGGTGGTGACGGTAAAATGAAAGATCTCAGTCC  
AAGATGGTATTTCTACTACCTAGGAACTGGGCCAGAAGCTGGACTTCCCTATGGTG  
TAACAAAGACGGCATCATATGGGTTGCAACTGAGGGAGCCTTGAATACACCAAAAG  
ATCACATTGGCACCCGCAATCCTGCTAACAATGCTGCAATCGTGCTACA ACTTCCTC  
AAGGAACAACATTGCCAAAAGGCTTCTACGCAGAAGGGAGCAGAGGGCGGCAGTCA  
AGCCTCTTCTCGTTCCTCATCACGTAGTCGCAACAGTTCAAGAAATTCAACTCCAGG  
CAGCAGTAGGGGAACTTCTCCTGCTAGAATGGCTGGCAATGGCGGTGATGCTGCTCT  
TGCTTTGCTGCTGCTTGACAGATTGAACCAGCTTGAGAGCAAAATGTCTGGTAAAGG  
CCAACAACAACAAGGCCAACTGTCTACTAAGAAATCTGCTGCTGAGGCTTCTAAGA  
AGCCTCGGCAAAAACGTACTGCCACTAAAGCATACAATGTAACACAAGCTTTCGGC  
AGACGTGGTCCAGAACAACCCAAGGAAATTTTGGGGACCAGGAACTAATCAGACA  
AGGAACTGATTACAAACATTGGCCGCAAAATTGCACAATTTGCCCCCAGCGCTTCAGC  
GTTCTTCGGAATGTCGCGCATTGGCATGGAAGTCACACCTTCGGGAACGTGGTTGAC  
CTACACAGGTGCCATCAAATTGGATGACAAAGATCCAAATTTCAAAGATCAAGTC

### **3. S-GENE (23693-23937)**

TCTATTGCCATACCCACAAATTTTACTATTAGTGTTACCACAGAAATTCTACCAAGTGT  
CTATGACCAAGACATCAGTAGATTGTACAATGTACATTTGTGGTGATTCAACTGAAT  
GCAGCAATCTTTTGTTGCAATATGGCAGTTTTTGTACACAATTAAACCGTGCTTTAAC  
TGGAATAGCTGTTGAACAAGACAAAAACACCCAAGAAGTTTTTGCACAAGTCAAAC  
AAATTTACAAAACACC

#### 4. ORF1ab-GENE (13286-14140)

GGATTTTGTGACTTAAAAGGTAAGTATGTACAAATACCTACAACCTTGTGCTAATGAC  
CCTGTGGGTTTTACACTTAAAAACACAGTCTGTACCGTCTGCGGTATGTGGAAAGGT  
TATGGCTGTAGTTGTGATCAACTCCGCGAACCCATGCTTCAGTCAGCTGATGCACAA  
TCGTTTTTAAACGGGTTTGCGGTGTAAGTGCAGCCCGTCTTACACCGTGCGGCACAG  
GCACTAGTACTGATGTCGTATACAGGGCTTTTGACATCTACAATGATAAAGTAGCTG  
GTTTTGCTAAATTCCTAAAACTAATTGTTGTCGCTTCCAAGAAAAGGACGAAGATG  
ACAATTTAATTGATTCTTACTTTGTAGTTAAGAGACACACTTTCTCTAACTACCAACA  
TGAAGAAACAATTTATAATTTACTTAAGGATTGTCCAGCTGTTGCTAAACATGACTT  
CTTTAAGTTTAGAATAGACGGTGACATGGTACCACATATATCACGTCAACGTCTTAC  
TAAATACACAATGGCAGACCTCGTCTATGCTTTAAGGCATTTTGATGAAGGTAATTG  
TGACACATTAAAAGAAATACTTGTCACATACAATTGTTGTGATGATGATTATTTCAA  
TAAAAAGGACTGGTATGATTTTGTAGAAAACCCAGATATATTACGCGTATACGCCAA  
CTTAGGTGAACGTGTACGCCAAGCTTTGTTAAAAACAGTACAATTCTGTGATGCCAT  
GCGAAATGCTGGTATTGTTGGTGTACTGACATTAGATAATCAAGATCTCAATGGTAA  
CTGGTATGATTTTCGGTGATTTTCATACAAACCACGCCAGGTAGTGGAGTTCCTGTTG

**\*Reference genome:** Severe acute respiratory syndrome coronavirus 2 isolate Wuhan-Hu-1, complete genome NCBI Reference Sequence: NC\_045512.2

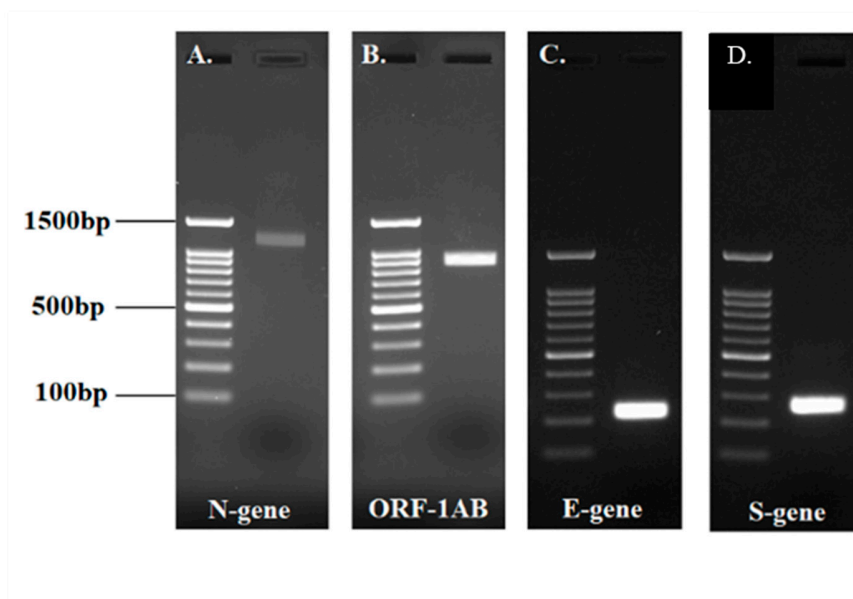

**Figure S2: PCR amplification and purification of customized DNA sequence of SARS-CoV-2.** PCR amplified and purified product visualised on agarose gel of **A)** N-gene (1129bp), **B)** ORF1ab-gene (855bp), **C)** E-gene (210bp), and, **D)** S-gene (245bp). L- DNA ladder (#MAGSPIN-21, APSLABS). All the experiments were replicated 3 times.

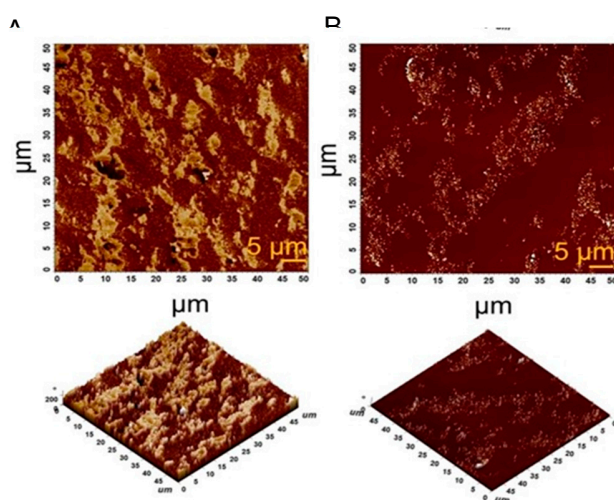

**Figure S3: Surface characterization of screen-printed gold electrode through AFM.** Topographical scan showing variation in the current magnitude at a scale of 5μm; **A.** screen-printed Au electrode (unmodified) and **B.** modified screen printed Au electrode/ $\beta$ -ME/ssDNA probe.

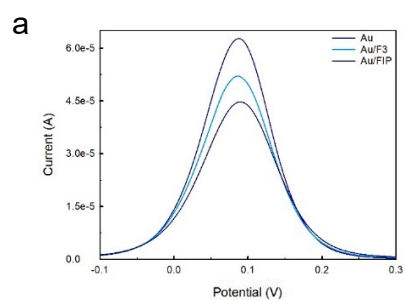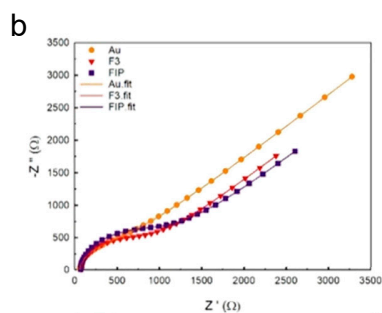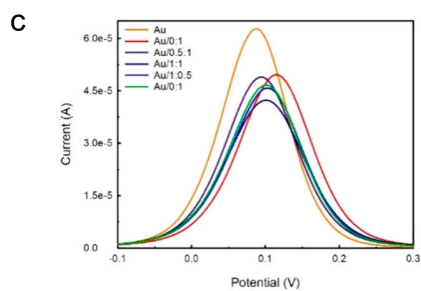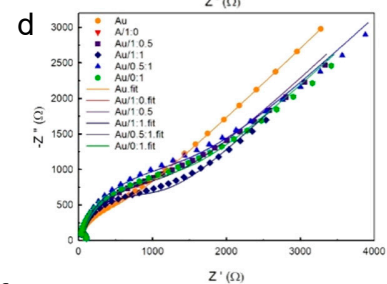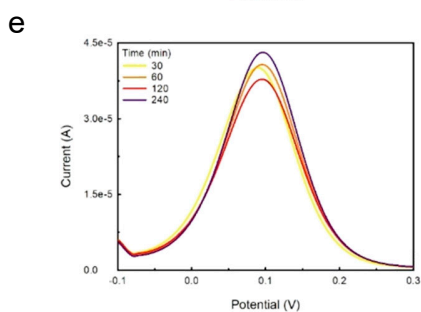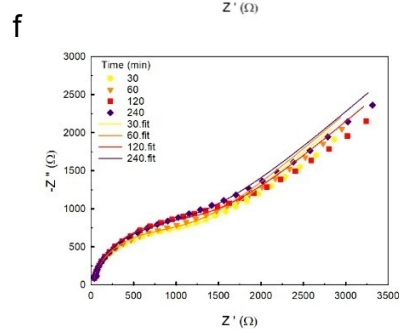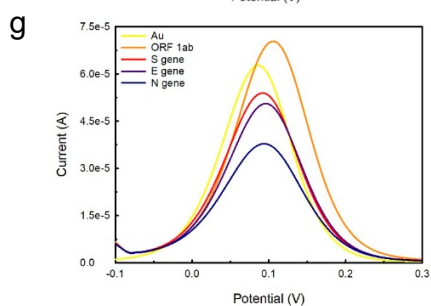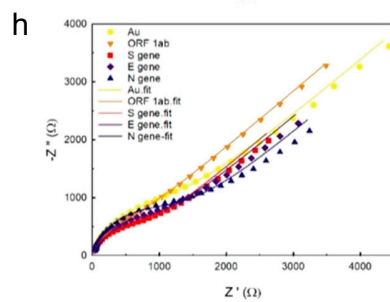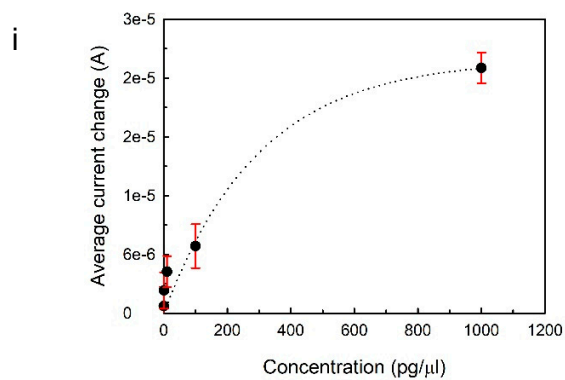

**Figure S4:** Differential pulse voltammogram and nyquist plot to determine the (a,b) primer type between F3 and FIP, (c,d) assembly of the spacer and primer, (e,f) effect of hybridisation time and (g,h) the response of non-complementary DNA (NcDNA) namely, ORF 1ab, S gene and E gene, (i) Standard plot between the average current change and concentration of customized RNA standards of N-gene
